## Animal personality shapes evolutionary trajectories via conserved genetic architecture.

Raphael Royauté <sup>a</sup>

Ann Hedrick <sup>b</sup>

Ned A. Dochtermann <sup>a, c</sup>

<sup>a</sup> Department of Biological Sciences; North Dakota State University

<sup>b</sup> Department of Neurobiology, Physiology, and Behavior; University of California, Davis

<sup>c</sup> corresponding author: [ned.dochtermann@gmail.com](mailto:ned.dochtermann@gmail.com)

### 1 **Abstract**

2 **Consistent individual differences in behavior, i.e. animal personality, are often**  
3 **correlated within broader syndromes<sup>1</sup> that can cause evolution in one trait to drive**  
4 **correlated changes in other behaviors via genetic correlations<sup>2</sup>. Despite abundant**  
5 **demonstration that these behavioral syndromes are common across taxa<sup>3,4</sup>, it has**  
6 **not been clear whether syndromes arise due to genetic and cellular mechanisms or**  
7 **because particular combinations of behavioral responses are favored. Here we show**  
8 **that populations of field crickets (*Gryllus integer*) exhibit a genetically conserved**  
9 **behavioral syndrome structure despite differences in average behaviors. We found**  
10 **that the distribution of genetic variation and covariance among behavioral traits was**  
11 **consistent with genes and cellular mechanisms underpinning behavioral syndromes**  
12 **rather than historic correlated selection. Moreover, divergence among populations'**  
13 **average behaviors was constrained by the genetically conserved behavioral**  
14 **syndrome. By constraining the divergence of populations, animal personality may**  
15 **therefore also affect the ability of species to behaviorally diverge and therefore**  
16 **speciation. This suggests important ways in which labile traits—traits that are highly**  
17 **plastic, like behavior, physiology, and life-history traits—might affect evolutionary**  
18 **outcomes.**

19 Behavior is frequently assumed to have been shaped by selection<sup>5</sup> and thus populations are  
20 expected to differ in a range of behaviors based on local selective pressures. This  
21 perspective implies that behaviors are able to evolve independently, an assumption  
22 increasingly challenged by the ubiquity of behavioral syndromes—correlations among  
23 behaviors<sup>6</sup>—which have been documented across taxonomic groups<sup>3,4</sup> and are comprised  
24 of both genetic and environmental contributions<sup>2,7</sup>.

25         Given the contribution of genetic correlations to behavioral syndromes<sup>7,8</sup>,  
26 syndromes have the potential to constrain the ability of populations to diverge and respond  
27 to local selective pressures<sup>9</sup>. Specifically, based on quantitative genetic theory, if  
28 syndromes reflect pleiotropic effects—where a single gene affects multiple behaviors—  
29 populations will be constrained to diverge along shared evolutionary pathways. Further,  
30 this divergence is predicted to occur in the direction in trait space that contains the most  
31 variation<sup>10</sup> (Figure 1). Consequently, if syndromes have a constraining effect on evolution,  
32 the pattern of correlations among traits will be conserved among populations (Figure 1).  
33 Alternatively, if genetic correlations underpinning syndromes are the result of selection  
34 historically favoring particular trait combinations (i.e. selection-induced linkage  
35 disequilibrium<sup>11</sup>), the divergence of populations will be relatively unconstrained as these  
36 genetic correlations are expected to rapidly break down when selection changes<sup>12</sup>.

37         These two quantitative genetic explanations for behavioral syndromes have explicit  
38 analogs in the behavioral literature: whether syndromes emerge from pleiotropy or other  
39 mechanistic effects is termed the “constraints hypothesis,” as opposed to selection-induced  
40 linkage disequilibrium, which is termed the “adaptive hypothesis” (Figure 1, see also<sup>13</sup>).

41 Knowing whether the constraints or adaptive hypothesis drives the emergence of  
42 behavioral syndromes is of critical importance. These hypotheses differentially affect  
43 evolutionary outcomes ranging from responses to environmental changes to speciation  
44 dynamics. For example, in *Anolis* lizards, constraints imposed by morphological genetic  
45 correlations have shaped divergence and the phenotypes possible during adaptive  
46 radiations<sup>14</sup>. Whether behavioral syndromes have similar effects is an open question.  
47 Unfortunately, while some studies have compared phenotypic or among-individual  
48 correlations across populations<sup>15-19</sup>, population comparison of behavioral syndromes at the  
49 additive genetic level has been restricted to a single pairwise comparison of two  
50 populations<sup>13</sup>. Consequently, the generality of the constraints versus adaptive hypotheses  
51 is unclear and the general effect of behavioral syndromes on population divergence is  
52 unknown.

53 Here we tested whether behavioral syndromes have diverged at the genetic level  
54 among populations of the field cricket, *Gryllus integer*. We critically evaluated predictions of  
55 the adaptive and constraints hypotheses (Figure 1) via comparisons of behavioral genetic  
56 (co)variance matrices, i.e. **G**, estimated for multiple populations of *G. integer* (Figure 2). We  
57 collected crickets from four populations, one in California (USA), one in Arizona (USA) and  
58 two in New Mexico (USA; Figure 2, Table S1) during the summer of 2017. Collected females  
59 ( $F_P$ ) were individually housed under standard conditions and allowed to oviposit into a  
60 cotton substrate (see Methods and Table S1). Offspring ( $F_0$ ) were then reared to maturity,  
61 after which known matings of males and females within population were conducted<sup>20</sup>,  
62 producing a subsequent generation of crickets ( $F_1$ ) of known parentage. This was repeated  
63 for a second generation ( $F_2$ ). We measured seven behaviors of  $F_0$ ,  $F_1$ , and  $F_2$  crickets (965

64 individuals in total, Table S1) in three ecologically relevant behavioral assays: latency to  
65 emerge from shelter, activity/exploration of a novel area, and locomotive response to cues  
66 of predator presence (see Methods). Based on the known relatedness among individuals  
67 we estimated  $\mathbf{G}$  for each population. We then compared the four populations to determine  
68 whether the differences among  $\mathbf{G}$ s were consistent with expectations of either the adaptive  
69 or constraints hypotheses based on the distribution of genetic variation in multivariate  
70 trait space<sup>10,14,21-23</sup> and based on whether correlations degraded across generations as  
71 expected under the adaptive hypothesis<sup>12</sup>.

72         As predicted under the constraints hypothesis, the populations exhibited conserved  
73 behavioral syndrome structure. This conclusion is supported by three primary lines of  
74 evidence: First, and most importantly, the four populations shared three subspaces in  
75 multivariate space that explained 99% of the observed genetic variation (Table S2; all  
76 Bayesian probabilities < 0.6 for differences). These subspaces were primarily characterized  
77 by variation in latencies to emerge from shelter, distance traveled during exploration, and  
78 in response to cues of predator presence (Table S2). These subspaces describe the  
79 structure of the species' behavioral syndrome and their being shared demonstrates that the  
80 orientation of genetic variation was conserved among the populations. Second, we found  
81 that the  $\mathbf{g}_{\max}$ 's (the dimension in which most behavioral variation was expressed<sup>10</sup>) of the  
82 Aguila and Dunnigan and Socorro and Aguila populations were strongly correlated (Figure  
83 2). This, again, demonstrates that behavioral syndrome structure is shared among the  
84 populations. Third, under the adaptive hypothesis, genetic correlations are expected to  
85 decrease by about 50% each generation with a corresponding decrease in phenotypic  
86 correlations (Appendix S1); these correlations were, instead, constant (Figure 3).

87           Despite this conservation of behavioral syndrome structure, populations did exhibit  
88   some degree of divergence. Importantly, however, this divergence was constrained by the  
89   structure of behavioral syndromes (Table S3). Specifically, the populations have diverged  
90   in their multivariate averages (Figure 4, Table S2) and in the magnitude of genetic variation  
91   present (Figure S3), but this divergence aligned with the shared behavioral syndrome (i.e.  
92   shared subspaces) of the populations (Table S3). The divergence in magnitude of genetic  
93   variation was driven by the three easternmost populations having less genetic variation  
94   than the Dunnigan, CA population (Figure S1). Whether this represents a loss of variation  
95   for the three eastern populations or the accumulation of variation for the western  
96   population is not currently clear.

97           We thus have three key results demonstrating conservation of behavioral  
98   syndromes at the genetic level despite differences among populations in average behavior.  
99   This conservation of behavioral syndrome structure has had the effect of constraining  
100   population divergence. Jointly these results provide strong support for the constraints  
101   hypothesis for the expression of behavioral syndromes. However, the first two results—  
102   shared subspaces and correlated  $\mathbf{g}_{\max}$ 's—could also result under the adaptive hypothesis if  
103   the selective pressures each of the populations experienced were the same. We consider  
104   this unlikely because of the degree of geographic separation among populations (Figure 2)  
105   and because  $\mathbf{g}_{\max}$  was most similar among populations that were geographically most  
106   separated (Figure 2). Moreover, our third main result directly contradicts the adaptive  
107   hypothesis: if trait correlations, like those of behavioral syndromes, arise due to the  
108   adaptive hypothesis and therefore selection-induced linkage disequilibrium, they are  
109   expected to rapidly degrade under random mating<sup>11,12</sup>. In direct contradiction of this

110 expectation we observed that correlations did not decrease across generations (Figure 3).  
111 Put another way, our first two results—which showed that the multivariate composition of  
112 behavioral syndromes was shared among populations—are consistent with the predictions  
113 of the constraints hypothesis. Next, our third result—the maintenance of behavioral  
114 correlations despite random mating—demonstrates the failure of predictions made by the  
115 adaptive hypothesis.

116         In contrast to our findings, a previous study with stickleback<sup>13</sup> found that two  
117 populations differed in the magnitude of heritabilities and genetic correlations between  
118 behaviors, albeit with overlapping confidence intervals. This earlier result is suggestive of  
119 behavioral syndromes emerging from correlated selection but predates the development of  
120 methods for the comparison of the full multivariate structure among populations as done  
121 here. Unfortunately, examination and comparison of pairwise genetic correlations can be  
122 misleading in regard to evolutionary constraints. For example, while two traits may be  
123 uncorrelated, each may be strongly correlated to others and differ in the magnitude of  
124 genetic variation available, thereby generating constraints not apparent from correlations.  
125 Instead, it is the overall multivariate structure of variation that shapes evolutionary  
126 responses and leads to quantitative constraints on evolution<sup>24,25</sup>—constraints that we have  
127 evaluated for behavioral syndromes for the first time here.

128         Behaviors like those measured here—exploratory behaviors and responses to  
129 predation threat—are frequently assumed to have been under selection and their  
130 responses to selection have been assumed to be unconstrained. Our results suggest an  
131 unrecognized and important role for behaviors like these and for behavioral syndromes in

132 the evolution of populations. That behavioral syndromes are important for trait divergence  
133 among populations implies that they may also affect speciation patterns. While correlations  
134 among morphological traits have been implicated in constraining speciation<sup>14,26,27</sup> and  
135 sexually selected behaviors have been argued to play a role in pre-zygotic reproductive  
136 isolation in allopatry<sup>28</sup>, the potential for behaviors like those examined here to influence  
137 speciation has not been critically evaluated. Moreover, genetic correlations are common  
138 across trait types<sup>2,29,30</sup> and, given that genetic variance is rarely limited<sup>31</sup>, these  
139 correlations should be expected to quantitatively constrain divergence and responses to  
140 selection even if they do not act as absolute constraints. Because behaviors exhibit  
141 heritabilities similar to those observed for life-history and physiological traits<sup>29,32,33</sup>, our  
142 results also suggest that correlations among labile traits—traits that are highly plastic—  
143 may actually play a role in shaping differences among populations and species. Our findings  
144 suggest that a more diverse range of traits and behaviors may have shaped population  
145 divergence and speciation patterns than previously considered.

#### 146 *Acknowledgements*

147 We thank Monica Berdal, Kathelyn Cannon, Jeremy Dalos, Sarah Felde, Brady Klock, Ishan  
148 Joshi, Hannah Lambert, Jenna LaCoursiere and Alondra Neunsinger for assistance in  
149 conducting behavioral trials and in rearing and care of the crickets and Martori Farms,  
150 David Lightfoot, Scott Bundy, Nico Franz, Sangmi Lee, Cameron Jones, Kenny Chapin, Ti  
151 Eriksson, Meranda Feagins, Charlotte Mulloney, Melody Martinez, Allyson Richins, Mauriel  
152 Rodriguez, Helen Vessels and David Wikman for assistance in collecting the crickets. We  
153 thank J. Pruitt, J. Bowsher, and members of the Gillam and Dochtermann labs at NDSU for  
154 important comments on earlier versions of this paper. This work was supported by US NSF  
155 IOS grants 1557951 and 1558069 to N.A.D. and A.H. respectively.

156 *Author Contributions*

157 N.A.D. and A.H. conceived the project and supervised the gathering of data, R.R analyzed the  
158 data, and N.A.D., A.H., and R.R. wrote the manuscript.



References Cited

- 159  
160
- 161 1 Sih, A., Bell, A. M., Johnson, J. C. & Ziemba, R. E. Behavioral syndromes: An integrative  
162 overview. *Quarterly Review of Biology* **79**, 241-277 (2004).
- 163 2 Dochtermann, N. A. Testing Cheverud's conjecture for behavioral correlations and  
164 behavioral syndromes. *Evolution* **65**, 1814-1820 (2011).
- 165 3 Garamszegi, L. Z., Marko, G. & Herczeg, G. A meta-analysis of correlated behaviours  
166 with implications for behavioural syndromes: mean effect size, publication bias,  
167 phylogenetic effects and the role of mediator variables. *Evolutionary Ecology* **26**,  
168 1213-1235, doi:10.1007/s10682-012-9589-8 (2012).
- 169 4 Garamszegi, L. Z., Marko, G. & Herczeg, G. A meta-analysis of correlated behaviors  
170 with implications for behavioral syndromes: relationships between particular  
171 behavioral traits. *Behavioral Ecology* **24**, 1068-1080, doi:10.1093/beheco/art033  
172 (2013).
- 173 5 Grafen, A. in *Behavioural ecology: An evolutionary approach* (eds J.R. Krebs & N. B.  
174 Davies) 62-84 (Sinauer, 1984).
- 175 6 Dingemanse, N. J., Dochtermann, N. A. & Nakagawa, S. Defining behavioural  
176 syndromes and the role of "syndrome" deviation in understanding their evolution.  
177 *Behavioral Ecology and Sociobiology* **66**, 1543-1548 (2012).
- 178 7 Dingemanse, N. J. & Dochtermann, N. A. in *Quantitative genetics in the wild* (eds A.  
179 Charmantier, D. Garant, & L. E. B. Kruuk) Ch. 4, (Oxford University Press, 2014).
- 180 8 Dochtermann, N. A., Schwab, T. & Sih, A. The contribution of additive genetic  
181 variation to personality variation: heritability of personality. *Proceedings Of The*  
182 *Royal Society B-Biological Sciences* **282**, 20142201 (2015).
- 183 9 Dochtermann, N. A. & Dingemanse, N. J. Behavioral syndromes as evolutionary  
184 constraints. *Behavioral Ecology* **24**, 806-811 (2013).

- 185 10 Schluter, D. Adaptive radiation along genetic lines of least resistance. *Evolution* **50**,  
186 1766-1774, doi:10.2307/2410734 (1996).
- 187 11 Roff, D. A. *Evolutionary Quantitative Genetics*. (Chapman and Hall, 1997).
- 188 12 Conner, J. K. Genetic mechanisms of floral trait correlations in a natural population.  
189 *Nature* **420**, 407-410, doi:10.1038/nature01105 (2002).
- 190 13 Bell, A. M. Behavioural differences between individuals and two populations of  
191 stickleback (*Gasterosteus aculeatus*). *Journal of Evolutionary Biology* **18**, 464-473  
192 (2005).
- 193 14 McGlothlin, J. W. *et al.* Adaptive radiation along a deeply conserved genetic line of  
194 least resistance in *Anolis* lizards. *Evolution Letters* **2**, 310-322 (2018).
- 195 15 Dingemanse, N. J. *et al.* Behavioural syndromes differ predictably between 12  
196 populations of three-spined stickleback. *Journal Of Animal Ecology* **76**, 1128-1138  
197 (2007).
- 198 16 Dochtermann, N. A., Jenkins, S. H., Swartz, M. & Hargett, A. C. The roles of  
199 competition and environmental heterogeneity in the maintenance of behavioral  
200 variation. *Ecology* **93**, 1330-1339, doi:10.1890/11-1025.1 (2012).
- 201 17 Pruitt, J. N. *et al.* Population differences in behaviour are explained by shared within-  
202 population trait correlations. *Journal of Evolutionary Biology* **23**, 748-756,  
203 doi:10.1111/j.1420-9101.2010.01940.x (2010).
- 204 18 Royauté, R., Buddle, C. M. & Vincent, C. Interpopulation variations in behavioral  
205 syndromes of a jumping spider from insecticide-treated and insecticide-free  
206 orchards. *Ethology* **120**, 127-139 (2014).
- 207 19 Michelangeli, M., Chapple, D. G., Goulet, C. T., Bertram, M. G. & Wong, B. Behavioral  
208 syndromes vary among geographically distinct populations in a reptile. *Behavioral*  
209 *Ecology* (2018).

- 210 20 Lynch, M. & Walsh, B. *Genetics and Analysis of Quantitative Traits*. 980 (Sinauer  
211 Associates, 1998).
- 212 21 Aguirre, J., Hine, E., McGuigan, K. & Blows, M. Comparing **G**: multivariate analysis of  
213 genetic variation in multiple populations. *Heredity* **112**, 21-29 (2014).
- 214 22 Hine, E., Chenoweth, S. F., Rundle, H. D. & Blows, M. W. Characterizing the evolution  
215 of genetic variance using genetic covariance tensors. *Philosophical Transactions of  
216 the Royal Society B: Biological Sciences* **364**, 1567-1578 (2009).
- 217 23 Walter, G. M., Aguirre, J. D., Blows, M. W. & Ortiz-Barrientos, D. Evolution of genetic  
218 variance during adaptive radiation. *The American Naturalist* **191**, E108-E128  
219 (2018).
- 220 24 Agrawal, A. F. & Stinchcombe, J. R. How much do genetic covariances alter the rate of  
221 adaptation? *Proceedings of the Royal Society B-Biological Sciences* **276**, 1183-1191,  
222 doi:10.1098/rspb.2008.1671 (2009).
- 223 25 Blows, M. W. A tale of two matrices: multivariate approaches in evolutionary  
224 biology. *Journal Of Evolutionary Biology* **20**, 1-8 (2007).
- 225 26 Simon, M. N., Machado, F. A. & Marroig, G. High evolutionary constraints limited  
226 adaptive responses to past climate changes in toad skulls. *Proceedings of the Royal  
227 Society B: Biological Sciences* **283**, 20161783 (2016).
- 228 27 Porto, A. *et al.* Rate of evolutionary change in cranial morphology of the marsupial  
229 genus *Monodelphis* is constrained by the availability of additive genetic variation.  
230 *Journal of evolutionary biology* **28**, 973-985 (2015).
- 231 28 Turelli, M., Barton, N. H. & Coyne, J. A. Theory and speciation. *Trends in ecology &  
232 evolution* **16**, 330-343 (2001).
- 233 29 Roff, D. A. The evolution of genetic correlations: An analysis of patterns. *Evolution*  
234 **50**, 1392-1403 (1996).

- 235 30 Teplitsky, C., Mouawad, N. G., Balbontin, J., de Lope, F. & Møller, A. P. Quantitative  
236 genetics of migration syndromes: a study of two barn swallow populations. *Journal*  
237 *of Evolutionary Biology* **24**, 2025-2039, doi:10.1111/j.1420-9101.2011.02342.x  
238 (2011).
- 239 31 Walsh, B. & Blows, M. W. Abundant genetic variation + strong selection =  
240 multivariate genetic constraints: a geometric view of adaptation. *Annual Review of*  
241 *Ecology, Evolution, and Systematics* **40**, 41-59,  
242 doi:doi:10.1146/annurev.ecolsys.110308.120232 (2009).
- 243 32 Stirling, D. G., Reale, D. & Roff, D. A. Selection, structure and the heritability of  
244 behaviour. *Journal of Evolutionary Biology* **15**, 277-289 (2002).
- 245 33 Dochtermann, N. A., Schwab, T., Berdal, M. A., Dalos, J. & Royaute, R. The heritability  
246 of behaviour: a meta-analysis. *Journal of Heredity* (in press).
- 247 34 Simmons, L. Female choice in the field cricket *Gryllus bimaculatus* (De Geer). *Animal*  
248 *Behaviour* **34**, 1463-1470 (1986).
- 249 35 Hedrick, A. V. & Kortet, R. Sex differences in the repeatability of boldness over  
250 metamorphosis. *Behavioral Ecology and Sociobiology* **66**, 407-412,  
251 doi:10.1007/s00265-011-1286-z (2012).
- 252 36 Kortet, R. & Hedrick, A. A behavioural syndrome in the field cricket *Gryllus integer*:  
253 intrasexual aggression is correlated with activity in a novel environment. *Biol. J.*  
254 *Linnean Soc.* **91**, 475-482, doi:10.1111/j.1095-8312.2007.00812.x (2007).
- 255 37 Kortet, R., Rantala, M. J. & Hedrick, A. Boldness in anti-predator behaviour and  
256 immune defence in field crickets. *Evolutionary Ecology Research* **9**, 185-197 (2007).
- 257 38 Niemela, P. T., Vainikka, A., Hedrick, A. V. & Kortet, R. Integrating behaviour with life  
258 history: boldness of the field cricket, *Gryllus integer*, during ontogeny. *Functional*  
259 *Ecology* **26**, 450-456, doi:10.1111/j.1365-2435.2011.01939.x (2012).

- 260 39 Royauté, R. & Dochtermann, N. A. When the mean no longer matters: developmental  
261 diet affects behavioral variation but not population averages in the house cricket  
262 (*Acheta domesticus*). *Behavioral Ecology* **28**, 337-345, doi:10.1093/beheco/arw164  
263 (2017).
- 264 40 Royauté, R., Garrison, C., Dalos, J., Berdal, M. A. & Dochtermann, N. A. Current energy  
265 state interacts with the developmental environment to influence behavioural  
266 plasticity. *Animal Behaviour* **148**, 39-51 (2019).
- 267 41 Royauté, R., Greenlee, K., Baldwin, M. & Dochtermann, N. A. Behaviour, metabolism  
268 and size: phenotypic modularity or integration in *Acheta domesticus*? *Animal*  
269 *Behaviour* **110**, 163-169 (2015).
- 270 42 Walsh, R. N. & Cummins, R. A. The open-field test: a critical review. *Psychol. Bull.* **83**,  
271 482 (1976).
- 272 43 Réale, D., Reader, S. M., Sol, D., McDougall, P. T. & Dingemanse, N. J. Integrating  
273 animal temperament within ecology and evolution. *Biol. Rev.* **82**, 291-318,  
274 doi:10.1111/j.1469-185X.2007.00010.x (2007).
- 275 44 Herman, C. S. & Valone, T. J. The effect of mammalian predator scent on the foraging  
276 behavior of *Dipodomys merriami*. *Oikos* **91**, 139-145 (2000).
- 277 45 Binz, H., Bucher, R., Entling, M. H. & Menzel, F. Knowing the risk: crickets distinguish  
278 between spider predators of different size and commonness. *Ethology* **120**, 99-110  
279 (2014).
- 280 46 Storm, J. J. & Lima, S. L. Predator-naïve fall field crickets respond to the chemical  
281 cues of wolf spiders. *Canadian Journal of Zoology* **86**, 1259-1263 (2008).
- 282 47 Kruuk, L. E. B. Estimating genetic parameters in natural populations using the  
283 'animal model'. *Philosophical Transactions Of The Royal Society Of London Series B-*  
284 *Biological Sciences* **359**, 873-890 (2004).

- 285 48 Hadfield, J. D. MCMC Methods for Multi-Response Generalized Linear Mixed Models:  
286 The MCMCglmm R Package. *J. Stat. Softw.* **33**, 1-22 (2010).
- 287 49 Roff, D. A., Prokkola, J. M., Krams, I. & Rantala, M. J. There is more than one way to  
288 skin a G matrix. *Journal of Evolutionary Biology* **25**, 1113-1126, doi:10.1111/j.1420-  
289 9101.2012.02500.x (2012).

Figures.

290 **Figure 1.** Two contrasting hypotheses can explain the presence of genetic correlations  
291 among behavioral traits (i.e. behavioral syndromes): Genetic constraints arising from  
292 pleiotropy and shared molecular mechanisms should lead isolated populations to express  
293 the same behavioral syndrome (top left panel). As a result, the vector correlations between  
294 major axes of genetic variation ( $\mathbf{g}_{\max}$ ) are predicted to be approaching 1 (bottom left  
295 panel). Alternatively, selection-induced linkage disequilibrium should lead to differing  
296 orientation and strength of behavioral syndromes when selective pressures differ among  
297 populations (top right panel). The vector correlation between  $\mathbf{g}_{\max}$ 's should therefore be  
298 below 1 (bottom right panel).

299 **Figure 2.** The genetic architecture of behavioral syndromes is shared in four isolated  
300 populations of *Gryllus integer*. Values along the diagonal (peach shading) represent  
301 describe the multivariate structure of behavioral variation: first the size (total genetic  
302 variance), second the shape (percent of variance explained by the major axis of genetic  
303 variation,  $\mathbf{g}_{\max}$ ), and, third, orientation (vector correlation between  $\mathbf{g}_{\max}$  and conserved  
304 genetic subspaces  $\mathbf{h}_{1-3}$ ). Off-diagonal elements (green shading) represent the correlation  
305 between the  $\mathbf{g}_{\max}$  of each population (top row) and the probability that alignment differed  
306 from 1: \*\*  $P < 0.01$ , \*  $P < 0.05$ .

307 **Figure 3.** A) Additive genetic ( $r_A$ ) and B) phenotypic correlations ( $r_P$ ) remained stable over  
308 the course of three successive generations compared to theoretical expectations based on  
309 selection-induced linkage disequilibrium and random mating ( $r_A$ :  $P_{\text{mcmc}}$  for difference from  
310 expectations under selection-induced linkage disequilibrium  $> 0.85$ ;  $r_P$ :  $P_{\text{mcmc}} F_2 > 0.80$ ).  
311 Error bars correspond to 95% credibility intervals around the posterior mean.

312 **Figure 4.** Evolutionary divergence in the structure of behavioral syndromes occurs along  
313 shared axes of genetic variation. A-C) Correlations between pairs of traits that exhibit the  
314 greatest variation in divergence (Table S2). Points represent breeding values for each  
315 individual within a population centered around the population mean for that trait.  $>50\%$  of  
316 divergence was in latency to emerge from shelter by antipredator response activity D)  
317 Population specific divergence in average behaviors. Population-specific  $\mathbf{G}$  matrices were  
318 visualized by transforming estimated breeding values for each trait based on the

319 divergence among populations. Ellipses represent the 95% confidence ellipses for each  
320 population centered at the multivariate species mean (DUN: Dunnigan CA, AG: Aguila AZ,  
321 SOC: Socorro NM, LC: Las Cruces NM).



### Constraints Hypothesis:

Genetic constraints result in behavioral syndromes being shared among populations

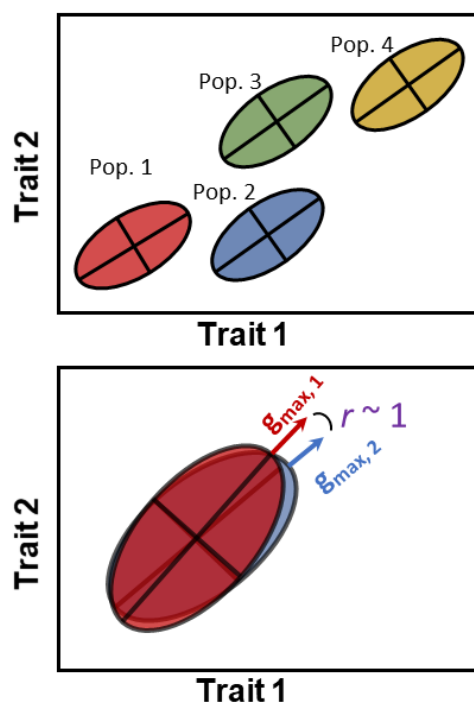

### Adaptive Hypothesis:

Natural selection shapes the orientation and strength of behavioral syndromes

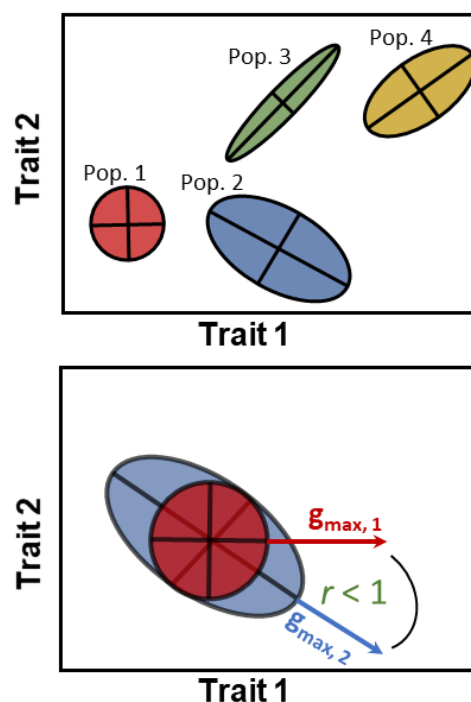

**Figure 1.** Two contrasting hypotheses can explain the presence of genetic correlations among behavioral traits (i.e. behavioral syndromes): Genetic constraints arising from pleiotropy and shared molecular mechanisms should lead isolated populations to express the same behavioral syndrome (top left panel). As a result, the vector correlations between major axes of genetic variation ( $g_{max}$ ) are predicted to be approaching 1 (bottom left panel). Alternatively, selection-induced linkage disequilibrium should lead to differing orientation and strength of behavioral syndromes when selective pressures differ among populations (top right panel). The vector correlation between  $g_{max}$ 's should therefore be below 1 (bottom right panel).

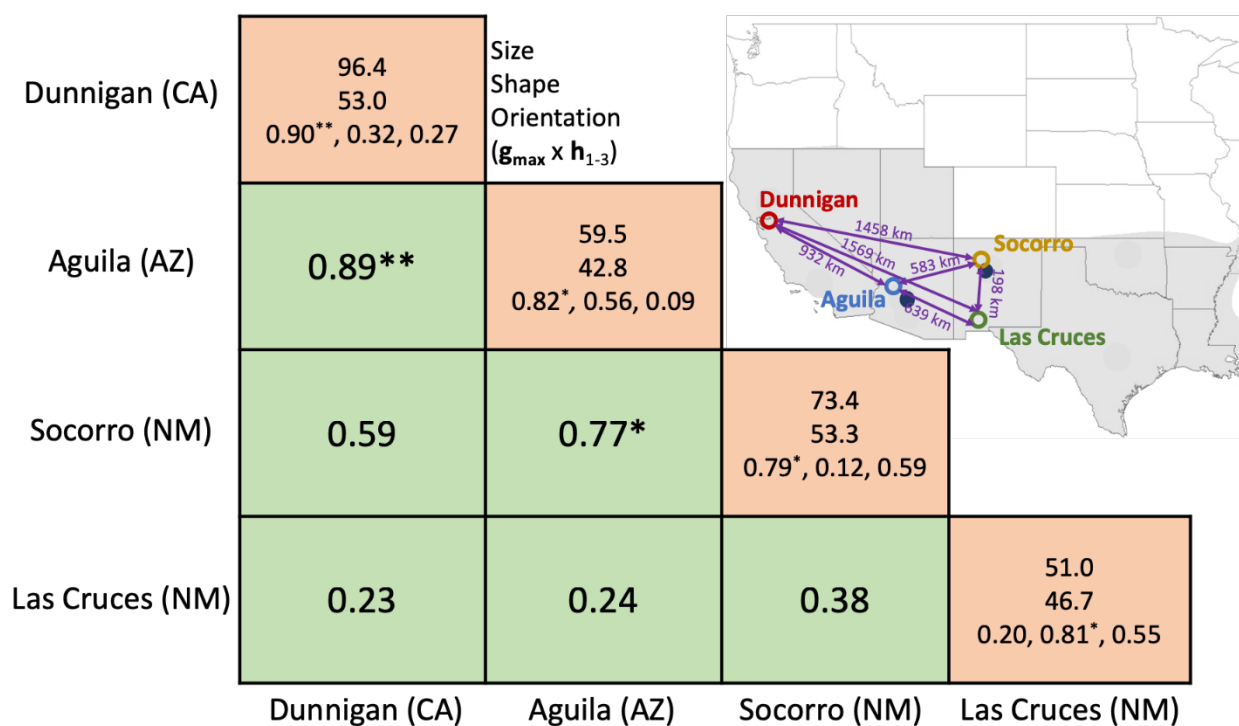

**Figure 2.** The genetic architecture of behavioral syndromes is shared in four isolated populations of *Gryllus integer*. Values along the diagonal represent (peach shading) describe the multivariate structure of behavioral variation: first the size (total genetic variance), second the shape (percent of variance explained by the major axis of genetic variation,  $\mathbf{g}_{\max}$ ), and, third, orientation (vector correlation between  $\mathbf{g}_{\max}$  and conserved genetic subspaces  $\mathbf{h}_{1-3}$ ). Off-diagonal elements represent the correlation between the  $\mathbf{g}_{\max}$  of each population (top row) and the probability that alignment differed from 1: \*\*  $P < 0.01$ , \*  $P < 0.05$ .

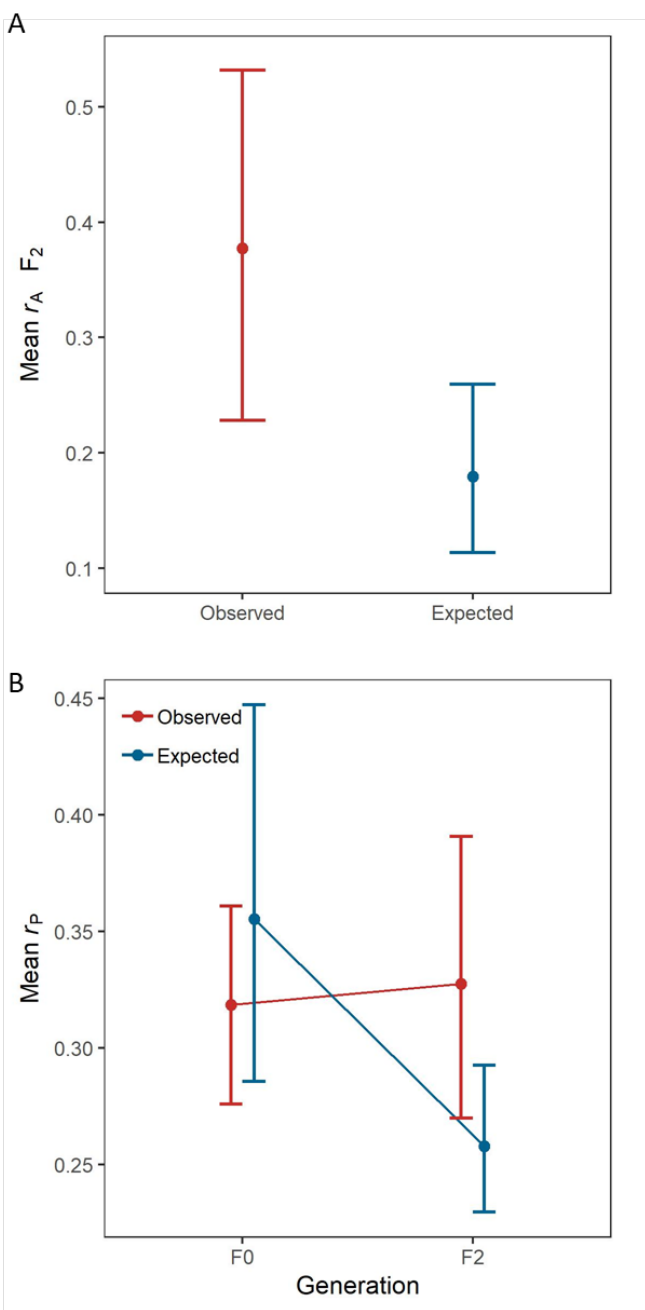

**Figure 3.** A) Additive genetic ( $r_A$ ) and B) phenotypic correlations ( $r_P$ ) remained stable over the course of three successive generations compared to theoretical expectations based on selection-induced linkage disequilibrium and random mating ( $r_A$ :  $P_{\text{mcmc}}$  for difference from expectations under selection-induced linkage disequilibrium > 0.85;  $r_P$ :  $P_{\text{mcmc}}$  F<sub>2</sub> > 0.80). Error bars correspond to 95% credibility intervals around the posterior mean.

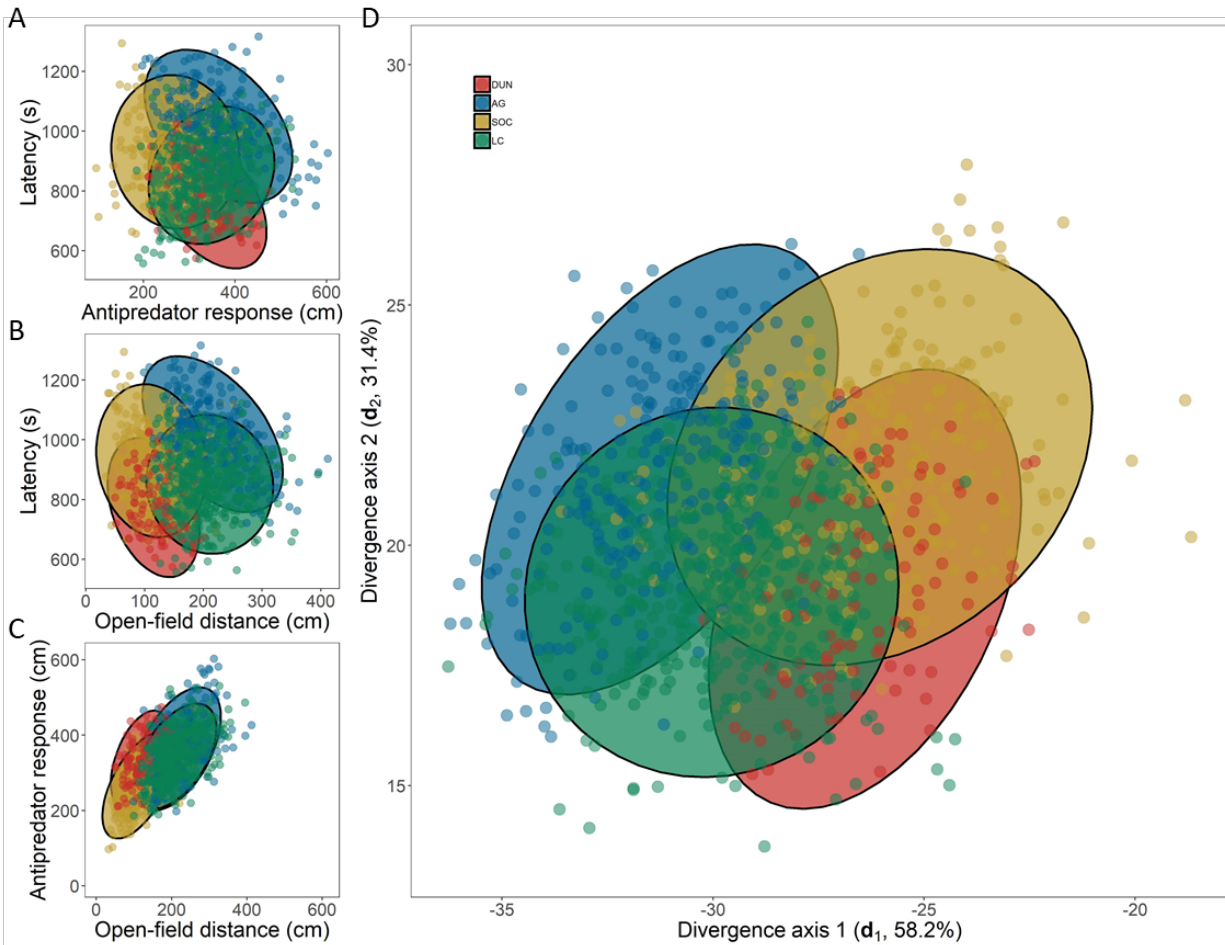

**Figure 4.** Evolutionary divergence in the structure of behavioral syndromes occurs along shared axes of genetic variation. A-C) Correlations between pairs of traits that exhibit the greatest variation in divergence (Table S2). Points represent breeding values for each individual within a population centered around the population mean for that trait. >50% of divergence was in latency to emerge from shelter by antipredator response activity D) Population specific divergence in average behaviors. Population-specific **G** matrices were visualized by transforming estimated breeding values for each trait based on the divergence among populations. Ellipses represent the 95% confidence ellipses for each population centered at the multivariate species mean (DUN: Dunnigan CA, AG: Aguila AZ, SOC: Socorro NM, LC: Las Cruces NM).

## 322 **Methods**

### 323 **Cricket collection**

324 We collected adult female crickets from four populations throughout the southwest and  
325 western US: Socorro, NM; Las Cruces, NM; Aguilla, AZ; and Dunnigan, CA (Figure 1) during  
326 the summer of 2017. Crickets from these locations are formally recognized as all members  
327 of *Gryllus integer* but additional splitting out of subspecies or different species based on  
328 population genetic structure is currently being considered (Weissman, personal  
329 communications). Around 50 females on average were collected from each population  
330 (Table S1) and taken to animal housing facilities at North Dakota State University. Females  
331 were housed individually in 0.71 L containers and provided with ad libitum food (Purina  
332 Chick Starter) and water (water was provided in glass vials capped with cotton). Each  
333 cricket was also provided with a small piece of cardboard egg carton for shelter. The cricket  
334 housing room was maintained on a 12:12 dark:light cycle reversed such that the room was  
335 dark during daytime hours. The housing room was kept at ~27C.

### 336 **Breeding design**

337 Females collected from the field (generation P) were assumed to have mated prior to  
338 capture (with the possibility of multiple mating, as is common in the genus<sup>34</sup>) and were  
339 allowed to oviposit in water vials while in their containers. Offspring of these females  
340 (termed generation F<sub>0</sub> as sires were unknown) hatched in their dam's container and were  
341 moved to individual housing prior to maturation. We assayed the behavior of 387 F<sub>0</sub>  
342 individuals (see below) upon maturation (Table S1). After behavioral trials, F<sub>0</sub> individuals  
343 were assigned to breeding pairs such that individual males were mated to multiple

344 randomly assigned females from the same population but different dams according to a  
345 standard full-sib, half-sib breeding design<sup>20</sup>. Matings were conducted as follows: females  
346 were moved from their normal housing containers to a larger container (34.6 × 21 × 12.4  
347 cm) along with their food dish, water vial, and egg carton shelter. After the female had been  
348 transferred, the assigned male was likewise moved to the large container, also with their  
349 food dish, water vial, and egg carton. The male and female remained in these containers for  
350 24 hours to allow sufficient time for courtship and multiple mating. After 24 hours the male  
351 and female crickets were returned to their original containers. If males were to be mated  
352 with additional females, they were allowed a minimum of 24 hours before repeating the  
353 above procedure. These F<sub>0</sub> females were subsequently allowed to oviposit into water vials  
354 within their containers. Resulting F<sub>1</sub> offspring were moved to individual housing prior to  
355 maturation and had their behaviors assayed upon maturation. After behavioral assays, F<sub>1</sub>  
356 individuals were likewise paired with F<sub>1</sub> individuals of the same population but different  
357 sires in the same manner and resulting F<sub>2</sub> offspring moved to individual housing and had  
358 their behavior measured upon maturation. This resulted in the behavioral testing of 395 F<sub>1</sub>  
359 individuals and 163 F<sub>2</sub> individuals (Table S1). Across the three generations this  
360 represented behavioral testing of 946 individual crickets.

### 361 **Behavioral testing**

362 All behavioral tests followed standard procedures previously validated in the literature for  
363 Gryllid crickets<sup>35-41</sup>. Below, we briefly describe these tests and their ecological relevance.

364 *Latency to emerge from shelter*

365 Gryllid crickets, including *G. integer*, use small burrows and natural cracks for refuge from  
366 predators and to which they retreat when under threat. As a result, latency to emerge from  
367 shelter after disturbance can be considered a proxy for risk-taking behavior or  
368 “boldness”<sup>37</sup>. Here, we conducted latency tests wherein individuals were transferred from  
369 their home containers to small artificial burrows (40 cm<sup>3</sup>) placed within a 34.6 × 21 cm  
370 arena. These artificial burrows were capped so that individuals could not immediately  
371 emerge. Crickets were forced to remain in the artificial burrow for two minutes after which  
372 the cap was removed. Crickets were then allowed six minutes and thirty seconds to emerge  
373 from the artificial burrow. During this test we recorded how long it took for an individual  
374 emerge (in seconds). Individuals that did not emerge were given a maximum latency of 390  
375 seconds.

#### 376 *Open field exploratory behavior*

377 Open field tests are a classic behavioral assay across taxa<sup>42</sup> which measure the exploratory  
378 propensity of individuals<sup>43</sup>, including for crickets<sup>39-41</sup>. Individuals that move through more  
379 of the arena are considered more thorough explorers<sup>43</sup>. Here we used open field tests to  
380 measure activity and exploratory propensity in a 30 × 30 cm plexiglass arena. Individuals  
381 were introduced into the arena under a small container and allowed to rest for 30 seconds  
382 after introduction. At the end of this 30 seconds, the container was removed and the cricket  
383 was allowed to explore the arena for 3 minutes and 40 seconds. The arena was cleaned  
384 with isopropyl alcohol between trials to remove any chemosensory cues from the arena.  
385 From this test we used Ethovision XT to record the total distance the individual moved  
386 during the trial (cm), the number of unique zones of the arena an individual visited during

387 the trial, and the variance in velocity of individuals (cm/s)<sup>2</sup>. This latter measure indicates  
388 whether an individual's speed of exploration was constant (low velocity variance) or  
389 whether individuals had frequent activity bursts punctuated by long bouts of inactivity  
390 (high velocity variance).

#### 391 *Response to cues of predator presence*

392 How individuals respond to cues of predator presence often varies within and among  
393 populations and is likely to covary with fitness<sup>16,44</sup>. Crickets respond to chemical cues of  
394 predator presence by either freezing or increasing activity depending on whether  
395 confronted by predator cues of sit-and-wait or active predators<sup>45,46</sup>. Here we used a  
396 behavioral assay to measure response to cues of predator presence previously validated  
397 with another Gryllid species<sup>39,40</sup>. Specifically, individuals were introduced into a 15 cm  
398 diameter circular arena (7.5 cm height) the floor of which is covered with dry filter paper  
399 that had been soaked with diluted excreta from leopard geckos (*Eublepharis macularius*).  
400 All leopard geckos were fed a diet of *G. integer* with occasional diet supplementation of  
401 mealworms (i.e. larval *Tenebrio molitor*) and the related decorated cricket (*Grylloides*  
402 *sigillatus*). Crickets were introduced to a portion of the arena without predator cue under  
403 a small shelter. After a 30s rest period, the shelter was removed and the individual allowed  
404 to freely move throughout the arena for 3 minutes and 40 seconds. We then used  
405 Ethovision XT to record the total distance an individual moved during the trial (cm). Total  
406 distance moved during the predator cue trial, the latency to first movement (in seconds),  
407 and the variance in velocity were used in subsequent analyses.

#### 408 **Statistical analyses**



409 **G matrix estimation**

410 We used multi-response mixed effect animal models<sup>47</sup> implemented using the MCMCglmm  
411 package in R<sup>48</sup> to estimate genetic variances and covariances. We included the effects of  
412 temperature of the behavioral arena room, sex of the individual, and mass of the individual  
413 as fixed-effects and the individual relatedness matrix (based on the known pedigree) as a  
414 random effect. Traits for which variances and covariances were estimated were: (i) the  
415 latency that an individual emerged from the shelter during the trial (censored gaussian),  
416 (ii) the distance moved during the open field trial (gaussian), (iii) the number of unique  
417 zones an individual visited during the open field trial (Poisson), (iv) the log-transformed  
418 variance in velocity during the open field trial (gaussian), (v) the square-root transformed  
419 distance an individual moved during the predator cue response trial (gaussian), (vi) the  
420 latency to initiate movement in the antipredator response trial (Poisson) and (vii) the log-  
421 transformed variance in velocity during the antipredator response trial (gaussian). Multi-  
422 response models were fit individually by population with each population's variances and  
423 covariances estimated from the posterior of an MCMC chain of  $4.8 \times 10^6$  iterations, with an  
424 800,000 burn-in period and a thinning interval of 4,000. A prior that was minimally  
425 informative for both variances and covariances was used. All variances and covariances  
426 were estimated at the additive genetic level and on the latent scale (Table S4).

427 *Population comparisons of G*

428 To compare behavioral syndrome structure at the additive genetic level we:

- 429 (i) compared alignment of dominant eigenvectors among populations (i.e.  $\mathbf{g}_{\max}$ ,  
430 Table S5<sup>10</sup>);

- 431 (ii) tested whether populations exhibited shared subspaces of  $\mathbf{G}^{21}$ ;
- 432 (iii) tested how populations differed in their variances and covariances (i.e.
- 433 genetic covariance tensor analysis<sup>21</sup>).

434 We followed the recommendations of Aguirre et al. (2014) in that all tests were based on

435 the full MCMC posterior distributions, null distributions for population comparisons were

436 based on randomizations of breeding values, and angles estimated against null

437 expectations of 0 (see also<sup>49</sup>). Specifically, to compare whether eigenvectors were

438 significantly aligned, we generated a random distribution of vector correlations following

439 <sup>14</sup>. The critical values of this distribution were 0.93 ( $P < 0.001$ ), 0.85 ( $P < 0.01$ ), 0.71 ( $P <$

440 0.05) and 0.62 ( $P < 0.1$ ). To assess the significance of eigenvalues of  $\mathbf{H}$  and  $\mathbf{E}$  against

441 random expectations, we calculated the largest posterior quantiles for which these

442 distributions did not overlap (Figures S2 and S3 respectively). This threshold serves as a

443 Bayesian probability in favor of the observed distribution being generated by patterns

444 other than chance (hereafter,  $P_{\text{mcmc}}$ ). We interpret these probabilities on the following

445 scale:  $P_{\text{mcmc}} < 0.7$ : poor evidence of difference compared to random expectations;  $P_{\text{mcmc}} >$

446 0.8: moderate evidence of difference compared to random expectations;  $P_{\text{mcmc}} > 0.9$  strong

447 evidence of difference compared to random expectations;  $P_{\text{mcmc}} > 0.95$ : very strong

448 evidence of difference compared to random expectations.

449

## Supplementary Materials

450

451 **Appendix S1.** Comparing observed patterns of phenotypic correlations with expectations  
452 based on SILD and random mating.

453 **Table S1.** Sample sizes by population and generation.

454 **Table S2.** Eigenvectors of phenotypic divergence (**d**), conserved genetic variation (**h**) and  
455 divergence in **G** (**e**).

456 **Table S3.** Vector correlation ( $r$ ) between major axes of phenotypic divergence (**d**),  
457 subspaces of conserved genetic variation (**h**) and subspaces representing genetic  
458 divergence (**e**).

459 **Table S4.** Genetic variances and covariances of four populations of field crickets.

460 **Table S5.** Eigen decomposition of **G** for each population.

461 **Figure S1.** Population coordinates and genetic variance along the leading eigentensors  
462 capturing most of the variation in divergence (**E1** and **E2**).

463 **Figure S2.** Eigenvalues of **H** for a comparison of the first three eigenvectors of each **G**  
464 matrix compared against random expectations.

465 **Figure S3.** Eigenvalues of the first three positive eigentensors of **S**.

466 **Appendix S1.** Comparing observed patterns of phenotypic correlations with expectations  
467 based on SILD and random mating.

468 Genetic correlations are expected to decline every new generation when they arise from  
469 selection-induced linkage disequilibrium (SILD). Conner<sup>12</sup> showed that in absence of both  
470 selection and linkage, the magnitude of genetic correlations under a SILD model and  
471 random mating should halve with every new generation. In contrast, genetic correlations  
472 caused by pleiotropic effects are expected to remain stable even after multiple generations  
473 of random mating. From this we expect the additive genetic correlation in the F<sub>2</sub> generation  
474 to be half as large as that of the F<sub>1</sub> generation:

$$475 \quad (1) r_{A, F_2} = \frac{1}{2} r_{A, F_1}$$

476 To test this hypothesis, we estimated the observed genetic covariance based on  
477 multivariate animal models including the data of the F<sub>0</sub> and F<sub>1</sub> and F<sub>1</sub> and F<sub>2</sub> generations  
478 respectively. These models were specified similarly to the multivariate models described in  
479 the main text, but population origin was added as a fixed effect to control for population  
480 differences in average trait expression. We transformed the genetic covariance matrix to a  
481 correlation matrix and calculated the observed average correlation coefficients,  $r_{A \text{ observed}}$ ,  
482 for every generation. We then compared,  $r_{A \text{ observed}}$  to the expected average correlation  
483 shown in equation (1). Since our multivariate models were specified within a Bayesian  
484 framework, we performed these operations on every slices of the posterior estimates to  
485 obtain 95 % credible intervals of observed and expected estimates and base our inference  
486 on the overlap between the two 95 % credible intervals.

487 Because phenotypic correlations result from the combined influence of genetic and  
488 environmental influences, it is also possible to compare the expected decline in phenotypic

489 correlations under SILD and random mating with the phenotypic correlations observed in  
490 every generation. The expected relationship between the phenotypic covariance in  
491 generation  $F_0$ ,  $F_1$  and  $F_2$  can therefore be expressed by the following sets of equations:

$$492 \quad (2) \mathbf{P}_{F_0} = 2 \mathbf{G}_{F_1} + \mathbf{E}$$

$$493 \quad (3) \mathbf{P}_{F_1} = \mathbf{G}_{F_1} + \mathbf{E}$$

$$494 \quad (4) \mathbf{P}_{F_2} = \frac{1}{2} \mathbf{G}_{F_1} + \mathbf{E}$$

495 Where  $\mathbf{P}_{F_x}$  and  $\mathbf{G}_{F_x}$  represent the phenotypic and genetic covariance matrices for  
496 generation  $F_x$  respectively and  $\mathbf{E}$  represents the overall environmental covariance matrix  
497 estimated across all generations. Note that these formulas only apply to the covariance  
498 among traits (i.e. the off-diagonal elements) while the genetic variances (i.e. the diagonal  
499 elements) are kept constant across generations.  $\mathbf{G}_{F_1}$  was used as our reference here  
500 because this generation had the largest sample size and thus had the most influence on the  
501 estimation of  $\mathbf{G}$ . We estimated  $\mathbf{G}_{F_1}$  from the animal model used to estimate equation (1) and  
502 we estimated  $\mathbf{E}$  using a model containing the data from all populations for every  
503 generations.

504 We then compared these expected covariances to the observed phenotypic  
505 covariance estimated for each generation separately by fitting multivariate models  
506 excluding pedigree information so that only the phenotypic covariance was estimated. As  
507 above, we converted each covariance matrix to a correlation matrix and compared the  
508 observed average correlation coefficient  $r_{P \text{ observed}}$  with the average correlation coefficient  $r_{P \text{ expected}}$   
509 for every generation.

510 **Table S1.** Number of sires, dams and phenotyped offspring for each population and  
 511 generation. The F<sub>0</sub> population represents the first population established in the laboratory  
 512 after collection of gravid females in the field. N indicates the number field collected females  
 513 for the F<sub>P</sub> generation.

514

| Population and generation       | No. of sires | No. of dams | No. offspring in pedigree | No. phenotyped offspring |
|---------------------------------|--------------|-------------|---------------------------|--------------------------|
| <b>Dunnigan (CA) (N = 38)</b>   |              |             |                           |                          |
| F <sub>0</sub>                  | 0            | 8           | 30                        | 30                       |
| F <sub>1</sub>                  | 6            | 8           | 36                        | 36                       |
| F <sub>2</sub>                  | 6            | 8           | 35                        | 35                       |
| Total                           | 12           | 24          | 101                       | 101                      |
| <b>Aguila (AZ) (N = 71)</b>     |              |             |                           |                          |
| F <sub>0</sub>                  | 0            | 32          | 144                       | 143                      |
| F <sub>1</sub>                  | 16           | 21          | 92                        | 92                       |
| F <sub>2</sub>                  | 2            | 2           | 16                        | 16                       |
| Total                           | 18           | 55          | 252                       | 251                      |
| <b>Socorro (NM) (N = 65)</b>    |              |             |                           |                          |
| F <sub>0</sub>                  | 0            | 19          | 112                       | 112                      |
| F <sub>1</sub>                  | 10           | 20          | 126                       | 125                      |
| F <sub>2</sub>                  | 4            | 4           | 8                         | 8                        |
| Total                           | 14           | 43          | 246                       | 245                      |
| <b>Las Cruces (NM) (N = 38)</b> |              |             |                           |                          |
| F <sub>0</sub>                  | 0            | 13          | 105                       | 102                      |
| F <sub>1</sub>                  | 20           | 47          | 157                       | 142                      |
| F <sub>2</sub>                  | 13           | 16          | 104                       | 104                      |
| Total                           | 33           | 76          | 366                       | 349                      |

515

**Table S2.** Eigenvectors of phenotypic divergence (**d**), conserved genetic variation (**h**) and divergence in **G** (**e**). Traits legend: Latency = latency to exit from the shelter, OF.Distance = distance travelled in the open-field test, UZ = number of unique zones explore in the open-field arena, OF.Var.Velo = variance in velocity in the open-field test, AP.Distance = distance travelled in the antipredator response test, AP.Lat.Mov = latency to initiate movement in the antipredator response test, AP.Var.Velo = variance in velocity in the antipredator response test.

| Traits               | <b>d</b> <sub>1</sub> | <b>d</b> <sub>2</sub> | <b>h</b> <sub>1</sub> | <b>h</b> <sub>2</sub> | <b>h</b> <sub>3</sub> | <b>E1 (53 %)</b>       |                        | <b>E2 (31 %)</b>       |  |
|----------------------|-----------------------|-----------------------|-----------------------|-----------------------|-----------------------|------------------------|------------------------|------------------------|--|
|                      |                       |                       |                       |                       |                       | <b>e</b> <sub>11</sub> | <b>e</b> <sub>21</sub> | <b>e</b> <sub>22</sub> |  |
| Latency              | <b>-0.32</b>          | <b>0.90</b>           | <b>-0.31</b>          | <b>0.86</b>           | <b>0.47</b>           | <b>0.63</b>            | 0.08                   | <b>0.77</b>            |  |
| OF.Distance          | <b>-0.80</b>          | <b>-0.34</b>          | 0.18                  | <b>-0.37</b>          | <b>0.88</b>           | -0.13                  | <b>-0.79</b>           | <b>0.42</b>            |  |
| UZ                   | -0.02                 | -0.06                 | 0.02                  | -0.02                 | 0.06                  | -0.01                  | -0.08                  | 0.06                   |  |
| OF.Var.Velo          | -0.09                 | -0.06                 | 0.02                  | -0.02                 | 0.07                  | -0.02                  | -0.10                  | 0.06                   |  |
| AP.Distance          | <b>-0.48</b>          | -0.04                 | <b>0.93</b>           | <b>0.35</b>           | 0.02                  | <b>-0.74</b>           | <b>-0.59</b>           | <b>-0.45</b>           |  |
| AP.Lat.Mov           | -0.05                 | 0.24                  | -0.10                 | -0.01                 | 0.02                  | 0.16                   | 0.07                   | 0.15                   |  |
| AP.Var.Velo          | -0.07                 | -0.03                 | 0.05                  | 0.02                  | 0.01                  | -0.05                  | -0.05                  | -0.02                  |  |
| % Variance explained | 58.2                  | 31.4                  | 33.1                  | 33.0                  | 32.9                  | 97.4                   | 69.5                   | 30.4                   |  |

**Table S3.** Vector correlation ( $r$ ) between major axes of phenotypic divergence ( $\mathbf{d}_1$ ,  $\mathbf{d}_2$ ), subspaces of conserved genetic variation ( $\mathbf{h}_1$ ,  $\mathbf{h}_2$ ,  $\mathbf{h}_3$ ) and subspaces representing genetic divergence ( $\mathbf{e}_{11}$ ,  $\mathbf{e}_{21}$ ,  $\mathbf{e}_{22}$ ). Probability of significant alignment: \*\*\*  $P < 0.001$ , \*\*  $P < 0.01$ , \*  $P < 0.05$ . Italics indicate significant alignment at  $P < 0.1$ .

|                   | $\mathbf{d}_1$ | $\mathbf{d}_2$ | $\mathbf{h}_1$ | $\mathbf{h}_2$ | $\mathbf{h}_3$ |
|-------------------|----------------|----------------|----------------|----------------|----------------|
| $\mathbf{h}_1$    | 0.49           | 0.40           |                |                |                |
| $\mathbf{h}_2$    | 0.15           | 0.89**         |                |                |                |
| $\mathbf{h}_3$    | 0.85**         | 0.06           |                |                |                |
| $\mathbf{e}_{11}$ | 0.25           | <i>0.69</i>    | 0.92**         | 0.33           | 0.18           |
| $\mathbf{e}_{21}$ | 0.90**         | 0.40           | 0.72*          | 0.16           | <i>0.67</i>    |
| $\mathbf{e}_{22}$ | 0.38           | 0.60           | 0.59           | 0.34           | 0.72*          |



516 **Table S4.** Genetic variances (shaded diagonal elements) and covariances (bottom off-  
 517 diagonal elements) of four populations of field crickets sampled in Dunnigan (CA), Aguila  
 518 (AZ), Socorro (NM) and Las Cruces (NM). The probability of excluding zero (Pmcmc) are  
 519 indicated on the top diagonal. Bold values indicate Pmcmc > 0.95, bold and italics indicate  
 520 Pmcmc > 0.90 and italics indicate Pmcmc > 0.80.

|                        | Latency      | OF.Dist      | UZ           | OF.Var.Velo  | AP.Dist      | AP.Lat.Mov  | AP.Var.Velo |
|------------------------|--------------|--------------|--------------|--------------|--------------|-------------|-------------|
| <b>Dunnigan (CA)</b>   |              |              |              |              |              |             |             |
| Latency                | <b>33.66</b> | 0.58         | 0.66         | 0.61         | <i>0.88</i>  | <b>0.95</b> | 0.77        |
| OF.Dist                | 1.89         | <b>21.58</b> | <b>0.95</b>  | <b>0.99</b>  | 0.57         | 0.54        | 0.64        |
| UZ                     | 0.62         | <b>1.96</b>  | <b>0.69</b>  | <b>0.99</b>  | 0.55         | 0.73        | 0.67        |
| OF.Var.Velo            | 0.38         | <b>2.18</b>  | <b>0.34</b>  | <b>0.43</b>  | 0.57         | 0.63        | 0.70        |
| AP.Dist                | -14.73       | 2.78         | 0.27         | 0.43         | <b>36.36</b> | <b>0.94</b> | <b>0.99</b> |
| AP.Lat.Mov             | <b>5.20</b>  | 0.02         | 0.27         | 0.10         | <b>-5.44</b> | <b>3.43</b> | 0.66        |
| AP.Var.Velo            | -0.90        | 0.41         | 0.08         | 0.08         | <b>2.09</b>  | -0.15       | <b>0.28</b> |
| <b>Aguila (AZ)</b>     |              |              |              |              |              |             |             |
| Latency                | <b>20.67</b> | 0.60         | 0.57         | 0.54         | 0.76         | 0.68        | 0.61        |
| OF.Dist                | -2.01        | <b>18.48</b> | <b>0.99</b>  | <b>0.99</b>  | 0.69         | 0.79        | 0.60        |
| UZ                     | -0.17        | <b>1.48</b>  | <b>0.37</b>  | <b>0.99</b>  | 0.54         | 0.70        | 0.47        |
| OF.Var.Velo            | -0.13        | <b>1.52</b>  | <b>0.17</b>  | <b>0.30</b>  | 0.61         | <i>0.80</i> | 0.65        |
| AP.Dist                | -4.28        | 2.80         | 0.10         | 0.21         | <b>17.89</b> | <i>0.83</i> | <b>0.99</b> |
| AP.Lat.Mov             | 0.91         | 1.13         | 0.09         | <i>0.15</i>  | <b>-1.27</b> | <b>1.61</b> | 0.69        |
| AP.Var.Velo            | -0.19        | 0.15         | 0.00         | 0.03         | <b>0.91</b>  | -0.06       | <b>0.16</b> |
| <b>Socorro (NM)</b>    |              |              |              |              |              |             |             |
| Latency                | <b>20.57</b> | 0.54         | 0.65         | 0.54         | 0.51         | 0.55        | 0.46        |
| OF.Dist                | -1.91        | <b>26.26</b> | <b>0.99</b>  | <b>1.00</b>  | <b>0.96</b>  | <b>0.90</b> | <b>0.91</b> |
| UZ                     | -0.48        | <b>2.16</b>  | <b>0.46</b>  | <b>1.00</b>  | <b>0.91</b>  | <i>0.89</i> | <i>0.82</i> |
| OF.Var.Velo            | -0.23        | <b>2.78</b>  | <b>0.29</b>  | <b>0.41</b>  | <b>0.94</b>  | <b>0.92</b> | <b>0.92</b> |
| AP.Dist                | -0.74        | <b>12.83</b> | <b>1.24</b>  | <b>1.58</b>  | <b>24.39</b> | <b>0.99</b> | <b>0.99</b> |
| AP.Lat.Mov             | 0.24         | <b>-1.68</b> | <i>-0.20</i> | <b>-0.23</b> | <b>-2.54</b> | <b>1.09</b> | 0.76        |
| AP.Var.Velo            | 0.07         | <b>0.97</b>  | <i>0.08</i>  | <b>0.13</b>  | <b>1.68</b>  | -0.09       | <b>0.22</b> |
| <b>Las Cruces (NM)</b> |              |              |              |              |              |             |             |
| Latency                | <b>22.00</b> | 0.55         | 0.64         | 0.68         | 0.74         | 0.69        | 0.77        |
| OF.Dist                | 0.43         | <b>12.46</b> | <b>0.99</b>  | <b>1.00</b>  | <b>0.92</b>  | <i>0.83</i> | <i>0.84</i> |
| UZ                     | -0.17        | <b>0.65</b>  | <b>0.21</b>  | <b>0.99</b>  | <i>0.86</i>  | <i>0.84</i> | 0.77        |
| OF.Var.Velo            | 0.26         | <b>1.02</b>  | <b>0.09</b>  | <b>0.18</b>  | <i>0.87</i>  | 0.76        | <b>0.94</b> |
| AP.Dist                | 3.16         | <b>4.90</b>  | <i>0.41</i>  | <i>0.54</i>  | <b>14.70</b> | <b>0.97</b> | <b>1.00</b> |
| AP.Lat.Mov             | -0.59        | <i>-0.92</i> | <i>-0.10</i> | -0.09        | <b>-1.67</b> | <b>1.30</b> | 0.72        |
| AP.Var.Velo            | 0.34         | <i>0.38</i>  | 0.03         | <b>0.07</b>  | <b>0.90</b>  | -0.06       | <b>0.13</b> |

**Table S5.** Eigen decomposition of **G** for each population. Bold values indicate loadings > 0.25 to help interpretation.

|             | <b>g<sub>max</sub></b> | <b>g<sub>2</sub></b> | <b>g<sub>3</sub></b> | <b>g<sub>4</sub></b> | <b>g<sub>5</sub></b> | <b>g<sub>6</sub></b> | <b>g<sub>7</sub></b> |  | <b>g<sub>max</sub></b> | <b>g<sub>2</sub></b> | <b>g<sub>3</sub></b> | <b>g<sub>4</sub></b> | <b>g<sub>5</sub></b> | <b>g<sub>6</sub></b> | <b>g<sub>7</sub></b> |
|-------------|------------------------|----------------------|----------------------|----------------------|----------------------|----------------------|----------------------|--|------------------------|----------------------|----------------------|----------------------|----------------------|----------------------|----------------------|
|             | Dunnigan (CA)          |                      |                      |                      |                      |                      |                      |  | Aguila (AZ)            |                      |                      |                      |                      |                      |                      |
| $\lambda$   | 51.11                  | 24.59                | 17.64                | 2.28                 | 0.52                 | 0.17                 | 0.13                 |  | 25.47                  | 17.59                | 14.52                | 1.38                 | 0.27                 | 0.16                 | 0.11                 |
| % Variance  | 53.00                  | 25.50                | 18.29                | 2.37                 | 0.54                 | 0.17                 | 0.14                 |  | 42.81                  | 29.56                | 24.40                | 2.32                 | 0.46                 | 0.26                 | 0.18                 |
| Latency     | <b>-0.66</b>           | <b>-0.47</b>         | <b>0.57</b>          | -0.11                | 0.00                 | 0.01                 | -0.01                |  | <b>0.70</b>            | <b>-0.53</b>         | <b>0.48</b>          | -0.04                | 0.00                 | 0.00                 | 0.00                 |
| OF.Distance | 0.03                   | <b>-0.78</b>         | <b>-0.61</b>         | -0.02                | -0.12                | -0.05                | -0.04                |  | <b>-0.44</b>           | <b>-0.84</b>         | <b>-0.29</b>         | -0.08                | 0.11                 | 0.03                 | -0.01                |
| UZ          | 0.00                   | -0.08                | -0.04                | 0.12                 | <b>0.92</b>          | <b>-0.33</b>         | -0.15                |  | -0.03                  | -0.07                | -0.03                | -0.02                | <b>-0.88</b>         | <b>0.42</b>          | -0.20                |
| OF.Var.Velo | 0.00                   | -0.09                | -0.05                | 0.05                 | <b>0.34</b>          | <b>0.72</b>          | <b>0.59</b>          |  | -0.03                  | -0.07                | -0.02                | 0.04                 | <b>-0.46</b>         | <b>-0.79</b>         | <b>0.40</b>          |
| AP.Distance | <b>0.73</b>            | <b>-0.40</b>         | <b>0.54</b>          | 0.10                 | -0.03                | -0.04                | 0.05                 |  | <b>-0.57</b>           | 0.00                 | <b>0.82</b>          | 0.08                 | -0.01                | 0.03                 | 0.04                 |
| AP.Lat.Mov  | -0.16                  | -0.01                | 0.00                 | <b>0.98</b>          | -0.14                | -0.05                | 0.05                 |  | 0.04                   | -0.09                | -0.07                | <b>0.99</b>          | 0.01                 | 0.04                 | -0.02                |
| AP.Var.Velo | 0.04                   | -0.03                | 0.02                 | 0.08                 | 0.07                 | <b>0.60</b>          | <b>-0.79</b>         |  | -0.03                  | 0.00                 | 0.04                 | 0.00                 | 0.00                 | <b>-0.45</b>         | <b>-0.89</b>         |
|             | Socorro (NM)           |                      |                      |                      |                      |                      |                      |  | Las Cruces (NM)        |                      |                      |                      |                      |                      |                      |
| $\lambda$   | 39.13                  | 20.44                | 12.52                | 0.83                 | 0.29                 | 0.11                 | 0.08                 |  | 23.81                  | 17.36                | 8.39                 | 1.09                 | 0.19                 | 0.10                 | 0.06                 |
| % Variance  | 53.31                  | 27.85                | 17.06                | 1.13                 | 0.39                 | 0.14                 | 0.11                 |  | 46.69                  | 34.05                | 16.46                | 2.13                 | 0.37                 | 0.19                 | 0.11                 |
| Latency     | 0.10                   | <b>0.99</b>          | -0.10                | 0.01                 | -0.02                | 0.01                 | 0.00                 |  | <b>0.86</b>            | <b>0.49</b>          | -0.13                | -0.01                | 0.01                 | 0.02                 | 0.00                 |
| OF.Distance | <b>-0.72</b>           | <b>0.01</b>          | <b>-0.68</b>         | -0.03                | 0.10                 | 0.05                 | 0.05                 |  | 0.23                   | <b>-0.61</b>         | <b>-0.75</b>         | -0.03                | -0.07                | 0.04                 | 0.03                 |
| UZ          | -0.06                  | -0.01                | -0.04                | 0.08                 | <b>-0.95</b>         | 0.19                 | 0.20                 |  | 0.01                   | -0.04                | -0.03                | 0.04                 | <b>0.91</b>          | <b>0.37</b>          | 0.18                 |
| OF.Var.Velo | -0.08                  | 0.00                 | -0.06                | 0.04                 | <b>-0.26</b>         | <b>-0.63</b>         | <b>-0.72</b>         |  | 0.03                   | -0.05                | -0.06                | -0.01                | <b>0.39</b>          | <b>-0.67</b>         | <b>-0.62</b>         |
| AP.Distance | <b>-0.67</b>           | 0.14                 | <b>0.72</b>          | -0.09                | 0.00                 | 0.06                 | -0.05                |  | <b>0.44</b>            | <b>-0.62</b>         | <b>0.64</b>          | -0.10                | -0.02                | 0.04                 | -0.04                |
| AP.Lat.Mov  | 0.08                   | -0.01                | -0.06                | <b>-0.98</b>         | -0.09                | 0.07                 | -0.09                |  | -0.07                  | 0.08                 | -0.04                | <b>-0.99</b>         | 0.03                 | 0.05                 | -0.02                |
| AP.Var.Velo | -0.05                  | 0.02                 | 0.04                 | -0.12                | -0.02                | <b>-0.74</b>         | <b>0.66</b>          |  | 0.03                   | -0.04                | 0.03                 | -0.05                | 0.11                 | <b>-0.64</b>         | <b>0.76</b>          |

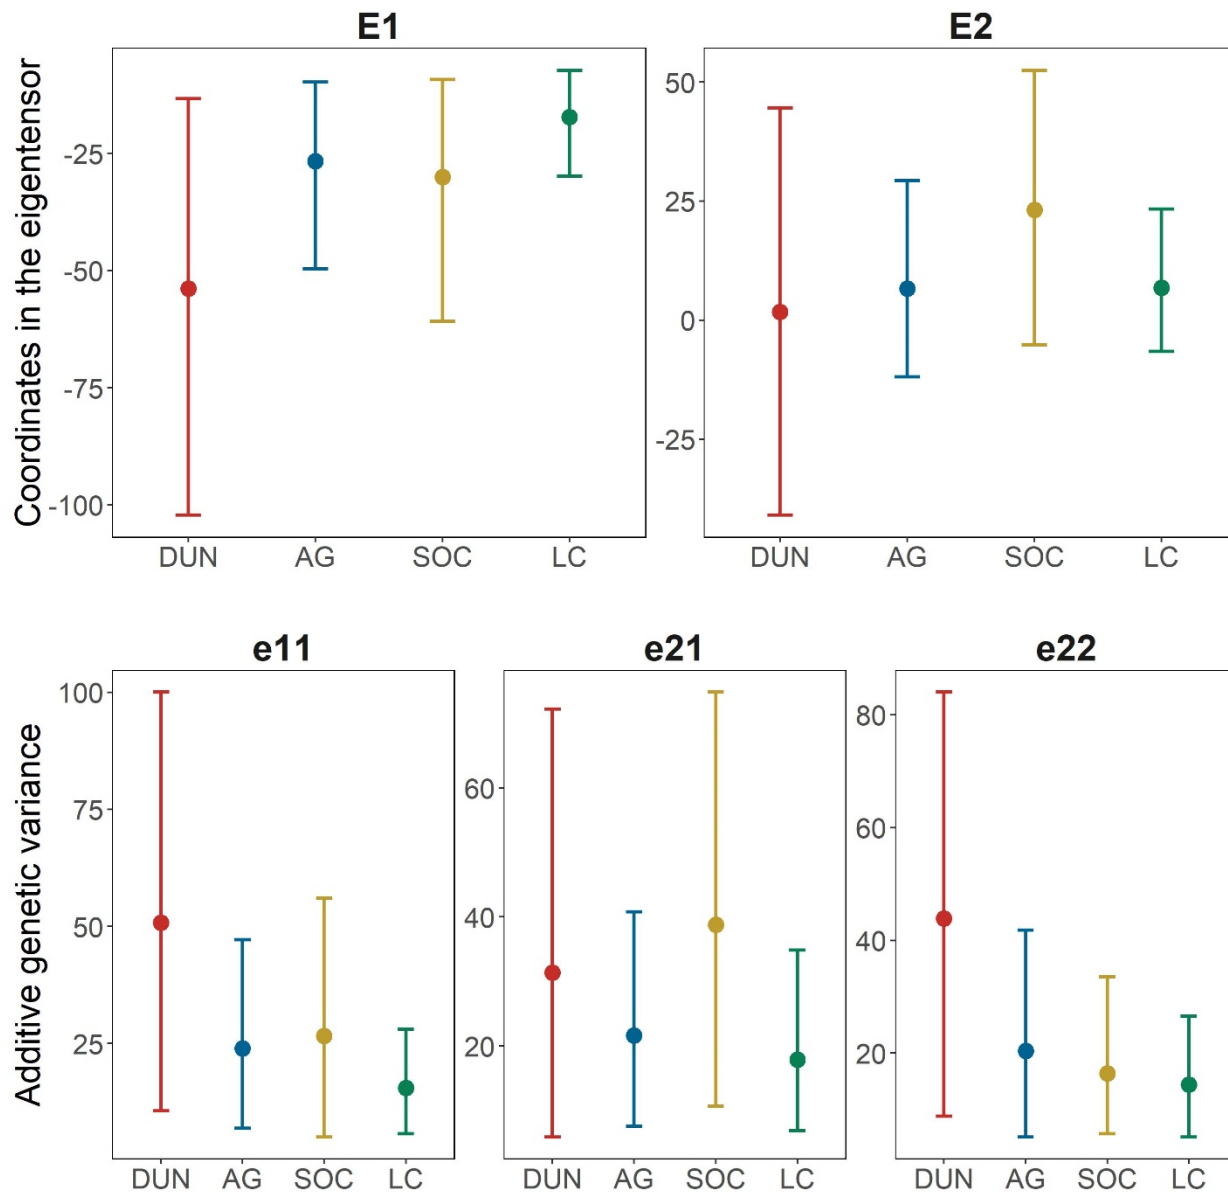

**Figure S1.** (a) Population coordinates along the leading eigenvectors capturing most of the variation in divergence (**E1** and **E2**). (b) Genetic variance in the direction of the leading eigenvectors of eigenvector **E1** and **E2**. The largest population differences were found between the Dunnigan (DUN) and Las Cruces (LC) populations along **E1** ( $P_{\text{mcmc}} > 0.85$ ) and its leading eigenvector **e**<sub>11</sub> ( $P_{\text{mcmc}} > 0.70$ ), all other  $P_{\text{mcmc}} < 0.70$ .

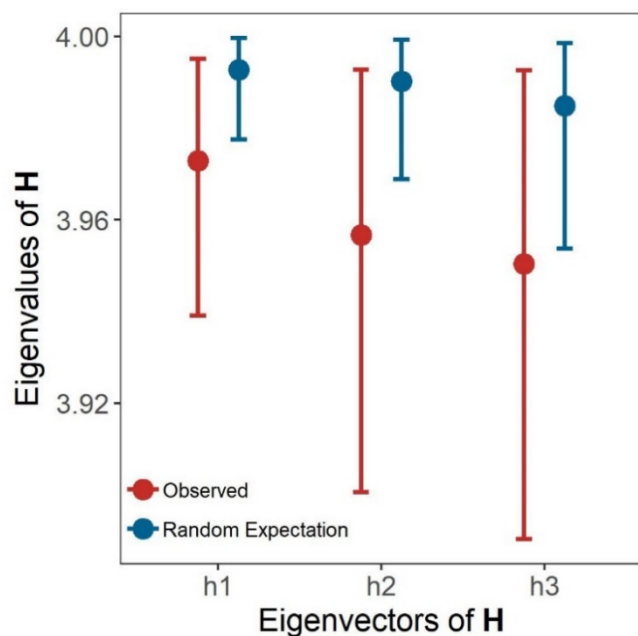

**Figure S2.** Eigenvalues of  $\mathbf{H}$  for a comparison of the first three eigenvectors of each  $\mathbf{G}$  matrix compared against random expectations. None of the eigenvectors of  $\mathbf{H}$  showed significant departure from random expectations ( $P_{\text{mcmc}} < 0.65$ ), indicating that major axes of genetic variation are highly conserved among populations. (h1:  $P_{\text{mcmc}} = 0.6$ , h2:  $P_{\text{mcmc}} = 0.65$ , h3:  $P_{\text{mcmc}} = 0.65$ )

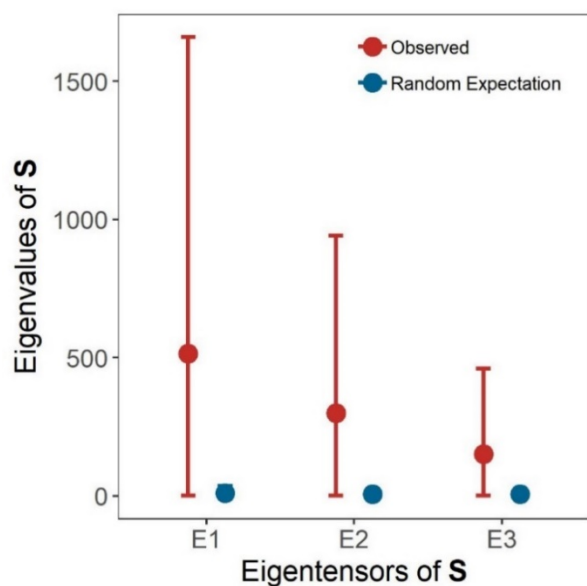

**Figure S3.** Eigenvalues of the first three positive eigentensors of  $\mathbf{S}$ . Both  $\mathbf{E}_1$ ,  $\mathbf{E}_2$  and  $\mathbf{E}_3$  were significantly different than expected from the random distribution ( $P_{\text{mcmc}} > 0.85$ ), indicating that populations differed along  $\mathbf{E}_1$ ,  $\mathbf{E}_2$  and  $\mathbf{E}_3$ . (E1:  $P_{\text{mcmc}} = 0.85$ , E2:  $P_{\text{mcmc}} = 0.85$ , E3:  $P_{\text{mcmc}} = 0.85$ )
